# Supplementary material for: Deconstructing the Polymerase Chain Reaction: Understanding and Correcting Bias Associated with Primer Degeneracies and Primer-Template Mismatches
Source: PubMed Central journal article supplement (PMC4440812; doi:10.1371/journal.pone.0128122), 2015-05-21
Supplement: pone.0128122.s007.pdf [file pone.0128122.s007.pdf]

## Supporting Information

**S2 File: Primer sites and mismatches with mock double-stranded DNA templates.** Degenerate positions in the primer pools are indicated with red, underlined letters. For each of the mock DNA templates (Mock A, B, C and D) number of variants with each individual primer in the pool is indicated. Additional mismatches were introduced near the 3' end of the annealing site for forward and reverse primers, as indicated by red, underlined letters for Mock C and D templates.

|                                                                                                                              |                                           |            | Mock A                   | Mock B                   | Mock C                          | Mock D                           |
|------------------------------------------------------------------------------------------------------------------------------|-------------------------------------------|------------|--------------------------|--------------------------|---------------------------------|----------------------------------|
|                                                                                                                              |                                           |            | (L/L)                    | (L/H)                    | (L+1mm/L)                       | (L+1mm/L+1mm)                    |
| <b>Forward primers</b>                                                                                                       | <b>Primer sequence</b>                    | <b>Tm*</b> | GTGCCAGCAGCC<br>GCGGTAA  | GTGCCAGCAGCC<br>GCGGTAA  | GTGCCAGCAGCC<br>GCGGT <u>CA</u> | GTGCCAGCAGCC<br>GCGGT <u>CA</u>  |
| <b>Degenerate Pool</b>                                                                                                       | <b>GTGCCAGC<u>M</u>GCCGCGGTAA</b>         |            | 0                        | 0                        | 1                               | 1                                |
| FP-Variant 1                                                                                                                 | GTGCCAGCAGCCGCGGTAA                       | 68.5       | 0                        | 0                        | 1                               | 1                                |
| FP-Variant 2                                                                                                                 | GTGCCAGCCGCCGCGGTAA                       | 70.7       | 1                        | 1                        | 2                               | 2                                |
|                                                                                                                              |                                           |            |                          |                          |                                 |                                  |
| <b>Reverse Primers</b>                                                                                                       | <b>Primer sequence</b>                    | <b>Tm*</b> | GGACTACTAGGG<br>TATCTAAT | GGACTACCCGGG<br>TTTCTAAT | GGACTACTAGGG<br>TATCTAAT        | GGACTACTAGGG<br>TATCTA <u>CT</u> |
| <b>Degenerate Pool</b>                                                                                                       | <b>GGACTACH<u>V</u>GGG<u>T</u>WTCTAAT</b> |            | 0                        | 0                        | 0                               | 1                                |
| RP-Variant 1                                                                                                                 | GGACTACTAGGGTATCTAAT                      | 53.5       | 0                        | 3                        | 0                               | 1                                |
| RP-Variant 2                                                                                                                 | GGACTACTAGGGTTTCTAAT                      | 54.6       | 1                        | 2                        | 1                               | 2                                |
| RP-Variant 3                                                                                                                 | GGACTACAAGGGTATCTAAT                      | 54.7       | 1                        | 3                        | 1                               | 2                                |
| RP-Variant 4                                                                                                                 | GGACTACAAGGGTTTCTAAT                      | 55.7       | 2                        | 2                        | 2                               | 3                                |
| RP-Variant 5                                                                                                                 | GGACTACCAGGGTATCTAAT                      | 56.4       | 1                        | 2                        | 1                               | 2                                |
| RP-Variant 6                                                                                                                 | GGACTACAGGGTATCTAAT                       | 56.4       | 2                        | 3                        | 2                               | 3                                |
| RP-Variant 7                                                                                                                 | GGACTACTGGGGTATCTAAT                      | 56.4       | 1                        | 3                        | 1                               | 2                                |
| RP-Variant 8                                                                                                                 | GGACTACTCGGGTATCTAAT                      | 56.4       | 1                        | 2                        | 1                               | 2                                |
| RP-Variant 9                                                                                                                 | GGACTACACGGGTATCTAAT                      | 57         | 2                        | 3                        | 2                               | 3                                |
| RP-Variant 10                                                                                                                | GGACTACTCGGGTTTCTAAT                      | 57.4       | 2                        | 1                        | 2                               | 3                                |
| RP-Variant 11                                                                                                                | GGACTACCAGGGTTTCTAAT                      | 57.5       | 2                        | 1                        | 2                               | 3                                |
| RP-Variant 12                                                                                                                | GGACTACAGGGTTTCTAAT                       | 57.5       | 3                        | 2                        | 3                               | 4                                |
| RP-Variant 13                                                                                                                | GGACTACTGGGGTTTCTAAT                      | 57.5       | 2                        | 2                        | 2                               | 3                                |
| RP-Variant 14                                                                                                                | GGACTACACGGGTATCTAAT                      | 58         | 3                        | 1                        | 3                               | 4                                |
| RP-Variant 15                                                                                                                | GGACTACCAGGGTATCTAAT                      | 58.7       | 2                        | 2                        | 2                               | 3                                |
| RP-Variant 16                                                                                                                | GGACTACCCGGGTATCTAAT                      | 58.7       | 2                        | 1                        | 2                               | 3                                |
| RP-Variant 17                                                                                                                | GGACTACCCGGGTTTCTAAT                      | 59.8       | 3                        | 1                        | 3                               | 4                                |
| RP-Variant 18                                                                                                                | GGACTACCCGGGTTTCTAAT                      | 59.8       | 3                        | 0                        | 3                               | 4                                |
|                                                                                                                              |                                           |            |                          |                          |                                 |                                  |
| * Tm (°C) calculated using OligoAnalyzer3.1, assuming 125 nM primer concentration, 2 mM Mg <sup>2+</sup> , and 0.2 mM dNTPs. |                                           |            |                          |                          |                                 |                                  |
