# Supplementary material for: Deconstructing the Polymerase Chain Reaction: Understanding and Correcting Bias Associated with Primer Degeneracies and Primer-Template Mismatches
Source: PubMed Central journal article supplement (PMC4440812; doi:10.1371/journal.pone.0128122), 2015-05-21
Supplement: pone.0128122.s008.pdf [file pone.0128122.s008.pdf]

## Supporting Information

### S3 File: List of FASTQ filenames and associated sample preparation details (BioProject PRJNA262579).

| Sample Name      | Sequencer | Barcode / MID | DNA Template | PEP/TAS | Temp(°C) | Exo-nuclease? | Primer (806R/806_NI) |
|------------------|-----------|---------------|--------------|---------|----------|---------------|----------------------|
| M1_1_2cy_28cy    | MiSeq     | TGCTACATCA    | Mock         | PEP     | 45       | No            | 806R                 |
| M1_2_2cy_28cy    | MiSeq     | TGATAGAGAG    | Mock         | PEP     | 45       | No            | 806R                 |
| M1_3_2cy_28cy    | MiSeq     | CTCAGCAGTG    | Mock         | PEP     | 45       | No            | 806R                 |
| M1e_1_2cy_28cy   | MiSeq     | CAGCTATAGC    | Mock         | PEP     | 45       | Yes           | 806R                 |
| M1e_2_2cy_28cy   | MiSeq     | GACTCATGCT    | Mock         | PEP     | 45       | Yes           | 806R                 |
| M1e_3_2cy_28cy   | MiSeq     | CACATACAGT    | Mock         | PEP     | 45       | Yes           | 806R                 |
| m1_1_45c_28_8    | MiSeq     | AATATGCTGC    | Mock         | TAS     | 45       | No            | 806R                 |
| m1_2_45c_28_8    | MiSeq     | AGAGGTCCGA    | Mock         | TAS     | 45       | No            | 806R                 |
| m1_3_45c_28_8    | MiSeq     | ATCTGTCCAT    | Mock         | TAS     | 45       | No            | 806R                 |
| M2_1_2cy_28cy    | MiSeq     | ACTCGATAGT    | Mock         | PEP     | 45       | No            | 806R_NI              |
| M2_2_2cy_28cy    | MiSeq     | CACGAGATGA    | Mock         | PEP     | 45       | No            | 806R_NI              |
| M2_3_2cy_28cy    | MiSeq     | TATAGAGATC    | Mock         | PEP     | 45       | No            | 806R_NI              |
| M1_1_55c_28_8    | MiSeq     | TCTAGCGTGG    | Mock         | TAS     | 55       | No            | 806R                 |
| M1_2_55c_28_8    | MiSeq     | TCTCGGATAG    | Mock         | TAS     | 55       | No            | 806R                 |
| M1_3_55c_28_8    | MiSeq     | GTATAACGCT    | Mock         | TAS     | 55       | No            | 806R                 |
| S1.1.2cy.28cy    | MiSeq     | TCATATCGCG    | Sed          | PEP     | 45       | No            | 806R                 |
| S1.2.2cy.28cy    | MiSeq     | TGCGAGACGT    | Sed          | PEP     | 45       | No            | 806R                 |
| S1.3.2cy.28cy    | MiSeq     | TACTGCAGCG    | Sed          | PEP     | 45       | No            | 806R                 |
| s1.1.45cy.28.8cy | MiSeq     | GACAGCAAGC    | Sed          | TAS     | 45       | No            | 806R                 |
| s1.2.45cy.28.8cy | MiSeq     | AAGTACACTC    | Sed          | TAS     | 45       | No            | 806R                 |
| s1.3.45cy.28.8cy | MiSeq     | AGTGGCAGGT    | Sed          | TAS     | 45       | No            | 806R                 |
| S1e.1.2cy.28cy   | MiSeq     | GCACGCGTAT    | Sed          | PEP     | 45       | Yes           | 806R                 |
| S1e.2.2cy.28cy   | MiSeq     | ACTAGCTGTC    | Sed          | PEP     | 45       | Yes           | 806R                 |
| S1e.3.2cy.28cy   | MiSeq     | CGAGCTAGCA    | Sed          | PEP     | 45       | Yes           | 806R                 |
| S2.1.2cy.28cy    | MiSeq     | TCATCATGCG    | Sed          | PEP     | 45       | No            | 806_NI               |
| S2.2.2cy.28cy    | MiSeq     | ACGTGCTCTG    | Sed          | PEP     | 45       | No            | 806_NI               |
| S2.3.2cy.28cy    | MiSeq     | TACATGATAG    | Sed          | PEP     | 45       | No            | 806_NI               |
| S2e.1.2cy.28cy   | MiSeq     | AGAGTCGCGT    | Sed          | PEP     | 45       | Yes           | 806_NI               |
| S2e.2.2cy.28cy   | MiSeq     | GATATATGTC    | Sed          | PEP     | 45       | Yes           | 806_NI               |
| S2e.3.2cy.28cy   | MiSeq     | ATCATATCTC    | Sed          | PEP     | 45       | Yes           | 806_NI               |
| Ma1              | PGM       | MID-19R       | Mock         | PEP     | 30       | Yes           | 806R                 |
| Ma2              | PGM       | MID-20R       | Mock         | PEP     | 35       | Yes           | 806R                 |
| Ma3              | PGM       | MID-21R       | Mock         | PEP     | 40       | Yes           | 806R                 |
| Ma4              | PGM       | MID-22R       | Mock         | PEP     | 45       | Yes           | 806R                 |
| Ma5              | PGM       | MID-23R       | Mock         | PEP     | 50       | Yes           | 806R                 |
| Ma6              | PGM       | MID-24R       | Mock         | PEP     | 55       | Yes           | 806R                 |
| Ma1D             | PGM       | MID-27R       | Mock         | PEP     | 30       | Yes           | 806R                 |
| Ma2D             | PGM       | MID-28R       | Mock         | PEP     | 35       | Yes           | 806R                 |
| Ma3D             | PGM       | MID-29R       | Mock         | PEP     | 40       | Yes           | 806R                 |
| Ma4D             | PGM       | MID-30R       | Mock         | PEP     | 45       | Yes           | 806R                 |
| Ma5D             | PGM       | MID-31R       | Mock         | PEP     | 50       | Yes           | 806R                 |
| Ma6D             | PGM       | MID-32R       | Mock         | PEP     | 55       | Yes           | 806R                 |
| Mb1              | PGM       | MID-51R       | Mock         | PEP     | 30       | Yes           | 806R                 |
| Mb2              | PGM       | MID-52R       | Mock         | PEP     | 35       | Yes           | 806R                 |

|      |     |         |      |     |    |     |      |
|------|-----|---------|------|-----|----|-----|------|
| Mb3  | PGM | MID-53R | Mock | PEP | 40 | Yes | 806R |
| Mb4  | PGM | MID-54R | Mock | PEP | 45 | Yes | 806R |
| Mb5  | PGM | MID-55R | Mock | PEP | 50 | Yes | 806R |
| Mb6  | PGM | MID-56R | Mock | PEP | 55 | Yes | 806R |
| Mb1D | PGM | MID-59R | Mock | PEP | 30 | Yes | 806R |
| Mb2D | PGM | MID-60R | Mock | PEP | 35 | Yes | 806R |
| Mb3D | PGM | MID-61R | Mock | PEP | 40 | Yes | 806R |
| Mb4D | PGM | MID-62R | Mock | PEP | 45 | Yes | 806R |
| Mb5D | PGM | MID-63R | Mock | PEP | 50 | Yes | 806R |
| Mb6D | PGM | MID-64R | Mock | PEP | 55 | Yes | 806R |
| Mc1  | PGM | MID-83R | Mock | TAS | 30 | No  | 806R |
| Mc2  | PGM | MID-84R | Mock | TAS | 35 | No  | 806R |
| Mc3  | PGM | MID-85R | Mock | TAS | 40 | No  | 806R |
| Mc4  | PGM | MID-86R | Mock | TAS | 45 | No  | 806R |
| Mc5  | PGM | MID-87R | Mock | TAS | 50 | No  | 806R |
| Mc6  | PGM | MID-88R | Mock | TAS | 55 | No  | 806R |
| Mc1D | PGM | MID-91R | Mock | TAS | 30 | No  | 806R |
| Mc2D | PGM | MID-92R | Mock | TAS | 35 | No  | 806R |
| Mc3D | PGM | MID-93R | Mock | TAS | 40 | No  | 806R |
| Mc4D | PGM | MID-94R | Mock | TAS | 45 | No  | 806R |
| Mc5D | PGM | MID-95R | Mock | TAS | 50 | No  | 806R |
| Mc6D | PGM | MID-96R | Mock | TAS | 55 | No  | 806R |
|      |     |         |      |     |    |     |      |
| A1   | PGM | MID-1R  | Chin | PEP | 30 | Yes | 806R |
| A2   | PGM | MID-2R  | Chin | PEP | 35 | Yes | 806R |
| A3   | PGM | MID-3R  | Chin | PEP | 40 | Yes | 806R |
| A4   | PGM | MID-4R  | Chin | PEP | 45 | Yes | 806R |
| A5   | PGM | MID-5R  | Chin | PEP | 50 | Yes | 806R |
| A6   | PGM | MID-6R  | Chin | PEP | 55 | Yes | 806R |
| A1D  | PGM | MID-10R | Chin | PEP | 30 | Yes | 806R |
| A2D  | PGM | MID-11R | Chin | PEP | 35 | Yes | 806R |
| A3D  | PGM | MID-13R | Chin | PEP | 40 | Yes | 806R |
| A4D  | PGM | MID-14R | Chin | PEP | 45 | Yes | 806R |
| A5D  | PGM | MID-15R | Chin | PEP | 50 | Yes | 806R |
| A6D  | PGM | MID-16R | Chin | PEP | 55 | Yes | 806R |
| B2   | PGM | MID-36R | Chin | PEP | 35 | Yes | 806R |
| B3   | PGM | MID-37R | Chin | PEP | 40 | Yes | 806R |
| B4   | PGM | MID-38R | Chin | PEP | 45 | Yes | 806R |
| B5   | PGM | MID-39R | Chin | PEP | 50 | Yes | 806R |
| B6   | PGM | MID-40R | Chin | PEP | 55 | Yes | 806R |
| B1D  | PGM | MID-43R | Chin | PEP | 30 | Yes | 806R |
| B2D  | PGM | MID-44R | Chin | PEP | 35 | Yes | 806R |
| B3D  | PGM | MID-45R | Chin | PEP | 40 | Yes | 806R |
| B4D  | PGM | MID-46R | Chin | PEP | 45 | Yes | 806R |
| B5D  | PGM | MID-47R | Chin | PEP | 50 | Yes | 806R |
| B6D  | PGM | MID-48R | Chin | PEP | 55 | Yes | 806R |
