# Supplementary material for: Deconstructing the Polymerase Chain Reaction: Understanding and Correcting Bias Associated with Primer Degeneracies and Primer-Template Mismatches
Source: PubMed Central journal article supplement (PMC4440812; doi:10.1371/journal.pone.0128122), 2015-05-21
Supplement: pone.0128122.s009.pdf [file pone.0128122.s009.pdf]

## Supporting Information

### S4 File: Temperature gradient tests of PEX and TAS methods using mock community DNA (“Chin”) at varying annealing temperatures.

| Method                                                 | Annealing Temperature | Exonuclease | Reverse Primer | Average percent abundance of reads mapping to references |        |        |        | Ideal Score | Ideal Score | Ideal Score      |
|--------------------------------------------------------|-----------------------|-------------|----------------|----------------------------------------------------------|--------|--------|--------|-------------|-------------|------------------|
|                                                        |                       |             |                | Mock A                                                   | Mock B | Mock C | Mock D |             |             |                  |
| <b>Stage "A" Annealing Temperature, PEX PCR Method</b> |                       |             |                |                                                          |        |        |        |             |             |                  |
| PEX PCR                                                | 30                    | Yes         | 806R           | 30.40                                                    | 58.19  | 11.12  | 0.29   | 77*         | 50*         | 31 <sup>NS</sup> |
| PEX PCR                                                | 35                    | Yes         | 806R           | 15.49                                                    | 57.76  | 26.36  | 0.39   | 68*         | 49*         | 58               |
| PEX PCR                                                | 40                    | Yes         | 806R           | 15.46                                                    | 51.70  | 32.29  | 0.56   | 68*         | 38*         | 54 <sup>NS</sup> |
| PEX PCR                                                | 45                    | Yes         | 806R           | 32.85                                                    | 35.00  | 31.56  | 0.59   | 49*         | 4*          | 3*               |
| PEX PCR                                                | 50                    | Yes         | 806R           | 32.62                                                    | 35.23  | 31.93  | 0.23   | 50*         | 4*          | 4*               |
| PEX PCR                                                | 55                    | Yes         | 806R           | 29.68                                                    | 41.73  | 28.44  | 0.15   | 50*         | 17*         | 17*              |
| <b>Stage "A" Annealing Temperature, TAS PCR Method</b> |                       |             |                |                                                          |        |        |        |             |             |                  |
| TAS PCR                                                | 30                    | No          | 806R           | 33.26                                                    | 63.77  | 2.94   | 0.04   | 94          | 61          | 31               |
| TAS PCR                                                | 35                    | No          | 806R           | 27.89                                                    | 65.93  | 6.11   | 0.08   | 88          | 65          | 41 <sup>#</sup>  |
| TAS PCR                                                | 40                    | No          | 806R           | 21.06                                                    | 70.54  | 8.34   | 0.06   | 91          | 74          | 54               |
| TAS PCR                                                | 45                    | No          | 806R           | 34.58                                                    | 58.95  | 6.42   | 0.05   | 87          | 54          | 26               |
| TAS PCR                                                | 50                    | No          | 806R           | 29.81                                                    | 63.35  | 6.78   | 0.06   | 86          | 60          | 36               |
| TAS PCR                                                | 55                    | No          | 806R           | 18.66                                                    | 76.33  | 4.93   | 0.08   | 103         | 86          | 61               |

\* Significant decrease in PEX PCR method relative to TAS PCR method; p<0.03, two-tailed TTEST (unequal variance)

# Significant decrease in TAS PCR relative to PEX PCR method; p<0.03, two-tailed TTEST (unequal variance)

NS = Not significant, two-tailed TTEST (unequal variance)
